# Supplementary material for: Exploring a new, connective Pummerer reaction: formation of oxindoles by the reaction of thiols with glyoxamides
Source: Royal Society of Chemistry journal article supplement (doi:10.1039/b613591a), 2006-10-31

# Exploring a new, connective Pummerer reaction: Formation of oxindoles by the reaction of thiols with glyoxamides

Marc Miller,<sup>a</sup> William Tsang,<sup>a</sup> Andrew Merritt<sup>b</sup> and David J. Procter\*<sup>a</sup>

<sup>a</sup> School of Chemistry, University of Manchester, Oxford Rd., Manchester, M13 9PL, UK. Email: david.j.procter@manchester.ac.uk

<sup>b</sup> GlaxoSmithKline, Gunnelswood Rd., Stevenage, SG1 2NY, UK.

## Supporting Information

- S2      General considerations**
- S3      Representative procedure for the connective Pummerer cyclisation with *mono*–glyoxamides – preparation of 12**
- S4      Representative procedure for the connective Pummerer cyclisation with 1,3–*bis*–glyoxamides – preparation of 19**
- S5      Representative procedure for the connective Pummerer cyclisation with 1,4–*bis*–glyoxamides – preparation of 29**
- S7      Selected <sup>1</sup>H and <sup>13</sup>C NMR spectra**

## General considerations

All experiments were performed under an atmosphere of N<sub>2</sub> using anhydrous solvents unless otherwise stated. Reactions were carried out using oven dried glassware. THF was distilled from sodium/benzophenone, CH<sub>2</sub>Cl<sub>2</sub> was distilled from CaH<sub>2</sub>, NEt<sub>3</sub> was distilled from CaH<sub>2</sub> and stored over KOH under N<sub>2</sub>. DMSO was distilled from CaH<sub>2</sub>, stored over molecular sieves and under N<sub>2</sub>. DMPU was distilled from CaH<sub>2</sub>, stored over molecular sieves and under N<sub>2</sub>.

<sup>1</sup>H NMR and <sup>13</sup>C NMR were recorded on a Fourier transform spectrometer, with chemical shift values being reported in ppm relative to residual chloroform ( $\delta_{\text{H}}$  7.27 or  $\delta_{\text{C}}$  77.2) as an internal standard unless otherwise stated. NMR signals were assigned using DEPT – 135, HMQC and COSY spectra. All coupling constants are reported in Hertz (Hz). Mass spectra were recorded using a Waters Trio 2000 and a Thermo Finnigan MAT 95 XP at the University of Manchester. IR spectra were recorded using a Bio-Rad Excalibur.

Column chromatography was carried using Fischer Matrix silica gel 60 and FluoroFlash silica. Macherey-Nagel aluminium backed plates, precoated with silica gel 60 (UV<sub>254</sub>) were used for thin-layer chromatography and were visualised by UV or staining with KMnO<sub>4</sub>.

## Representative procedure for the connective Pummerer cyclisation with *mono*-glyoxamides

### Methyl 3-(5-fluoro-2-oxo-1-proplindolin-3-ylthio) propanoate **12**

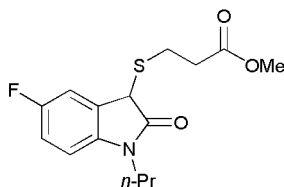

To a solution of oxalyl chloride (203  $\mu$ l, 2.13 mmol, 1.1 eq) in  $\text{CH}_2\text{Cl}_2$  (6 ml) was added DMSO (302  $\mu$ l, 4.25 mmol, 2 eq) in  $\text{CH}_2\text{Cl}_2$  (3 ml) at  $-78^\circ\text{C}$ . After 0.5 h, *N*-(4-fluorophenyl)-*N*-propyl-2-hydroxyacetamide (449 mg, 2.13 mmol, 1 eq) in  $\text{CH}_2\text{Cl}_2$  (5 ml) was added. After a further 1 h,  $\text{Et}_3\text{N}$  (1.48 ml, 10.62 mmol, 5 eq) was added and reaction allowed to warm to room temp. After 1 h,  $\text{CH}_2\text{Cl}_2$  (15 ml) was added to reaction mixture. Organic layer was washed with  $\text{NaHCO}_3$  ( $3 \times 15$  ml) then dried ( $\text{MgSO}_4$ ), filtered and concentrated *in vacuo* to give the crude glyoxamide, which was used without further purification.  $\text{CH}_2\text{Cl}_2$  (8 ml) was added to crude glyoxamide (197 mg, 0.93 mmol, 1 eq) followed by thiol ester (101  $\mu$ l, 0.93 mmol, 1 eq) and reaction allowed to stir at room temp for 18 h. TFAA (1.19 ml, 8.39 mmol, 9 eq) was then added and after a further 1 h  $\text{BF}_3\cdot\text{OEt}_2$  (574  $\mu$ l, 4.66 mmol, 5 eq). After stirring for 1 h, reaction was quenched with  $\text{NaHCO}_3$  (15 ml), the organic layer was washed with  $\text{NaHCO}_3$  ( $2 \times 15$  ml), dried ( $\text{MgSO}_4$ ), filtered and concentrated *in vacuo* to give an orange oil. The crude mixture was then purified by column chromatography using 20% EtOAc in petroleum ether as eluant to give methyl 3-(5-fluoro-2-oxo-1-proplindolin-3-ylthio) propanoate **12** (197 mg, 0.62 mmol, 67% for 2 steps) as a light orange oil.

$^1\text{H}$  NMR (300 MHz,  $\text{CDCl}_3$ )  $\delta$  0.98 (3H, t,  $J = 7.4$  Hz,  $\text{CH}_3$ ), 1.53 (2H, sextet,  $J = 7.4$  Hz,  $\text{CH}_2$ ), 2.63 (3H, t,  $J = 7.1$  Hz,  $\text{SCH}_2\text{CH}_2\text{C}=\text{O}$ ), 2.77-2.86 (1H, m, 1H of  $\text{CH}_2\text{S}$ ), 2.98-3.07 (1H, m, 1H of  $\text{CH}_2\text{S}$ ), 3.58-3.69 (2H, m,  $\text{CH}_2\text{N}$ ), 3.67 (3H, s,  $\text{CO}_2\text{CH}_3$ ), 4.30 (1H, s,  $\text{CHS}$ ), 6.74 (1H, dd,  $J = 4.1, 8.5$  Hz,  $\text{ArCH}$ ), 6.85 (1H, dt,  $J = 2.6, 8.5$  Hz,  $\text{ArCH}$ ), 7.15 (1H, ddd,  $J = 0.9, 2.6, 7.8$  Hz,  $\text{ArCH}$ ).

$^{13}\text{C}$  NMR (75 MHz,  $\text{CDCl}_3$ )  $\delta$  11.6 ( $\text{CH}_3$ ), 20.9 ( $\text{CH}_2$ ), 25.2 ( $\text{CH}_2\text{S}$ ), 34.5 ( $\text{CH}_2\text{C}=\text{O}$ ), 42.1 ( $\text{CH}_2\text{N}$ ), 45.0 ( $\text{CHS}$ ), 52.1 ( $\text{CO}_2\text{CH}_3$ ), 109.3 ( $\text{ArCH}$ , d,  $J = 8.1$  Hz), 113.5 ( $\text{ArCH}$ , d,  $J = 25.0$  Hz), 115.6 ( $\text{ArCH}$ , d,  $J = 23.3$  Hz), 127.6 ( $\text{ArC}$ , d,  $J = 8.3$  Hz), 139.6 ( $\text{ArC}$ , d,  $J = 2.0$  Hz), 159.4 ( $\text{ArCF}$ , d,  $J = 243.6$  Hz), 172.2 ( $\text{C}=\text{O}$  amide), 175.1 ( $\text{C}=\text{O}$  ester).

$\nu_{\max}/(\text{cm}^{-1})$  2938, 1715 (C=O), 1613, 1448, 1345, 1165, 981

MS  $m/z$  ( $\text{CI}^+$  mode) 312 ( $(\text{M}^+ + \text{H})$ , 24%), 194 (100%), 136 (14%), 108 (15%), 72 (19%), 60 (42%);  $\text{C}_{15}\text{H}_{19}\text{O}_3\text{NFS}$  requires 312.1064, found 312.1066.

## Representative procedure for the connective Pummerer cyclisation with a 1,3-bis-glyoxamides

### 3,5-Bis benzylsulfonyl-1,7-dipropyl-5,7-dihydro-1*H*, 3*H*-pyrrolo[3,2-*f*] indole-2,6-dione **19**

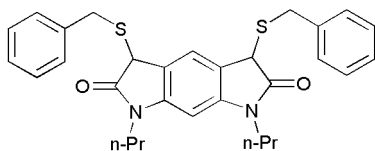

To a solution of oxalyl chloride (120  $\mu\text{l}$ , 1.37 mmol, 2.2 eq) in  $\text{CH}_2\text{Cl}_2$  (2 ml) at  $-78^\circ\text{C}$  was added a solution of DMSO (177  $\mu\text{l}$ , 2.50 mmol, 4 eq) in  $\text{CH}_2\text{Cl}_2$  (2 ml). After stirring for 30 min a solution of 2-hydroxy-*N*-[3-(hydroxy acetyl-propyl amine)-phenyl]-*N*-propyl acetamide (194 mg, 0.62 mmol, 1 eq) in  $\text{CH}_2\text{Cl}_2$  (3 ml) was added. After stirring for a further 1 h at  $-78^\circ\text{C}$ ,  $\text{NEt}_3$  (863  $\mu\text{l}$ , 6.20 mmol, 10 eq) was added and the reaction allowed to stir at room temperature for 1.5 h.  $\text{CH}_2\text{Cl}_2$  (15 ml) was added to the reaction mixture and the organic layer washed with  $\text{NaHCO}_3$  ( $3 \times 20$  ml), dried ( $\text{MgSO}_4$ ) and concentrated *in vacuo* to give the crude *bis*-glyoxamide, which was used without further purification.  $\text{CH}_2\text{Cl}_2$  (4 ml) was added to the crude *bis*-glyoxamide (90 mg) followed by benzyl mercaptan (48  $\mu\text{l}$ , 0.41 mmol, 1.4 eq) and the reaction was allowed to stir at room temperature for 18 h. TFAA (761  $\mu\text{l}$ , 5.27 mmol, 18 eq) was then added and after a further 1 h,  $\text{BF}_3 \cdot \text{Et}_2\text{O}$  (410  $\mu\text{l}$ , 2.93 mmol, 10 eq). After stirring for 1 h the reaction was quenched with  $\text{NaHCO}_3$  (20 ml), the organic layer was washed with  $\text{NaHCO}_3$  ( $2 \times 30$  ml), dried ( $\text{MgSO}_4$ ), filtered and concentrated *in vacuo* to give a blue oil. The crude reaction mixture was then purified by flash chromatography using 30 % EtOAc in petroleum ether as eluant to give 3,5-bis benzylsulfonyl-1,7, dipropyl-5,7-dihydro 1*H*, 3*H*-pyrrolo[3,2-*f*] indole-2,6-dione **19** (769 mg, 0.15 mmol, 51% over 2 steps) as a dark purple oil.

$^1\text{H}$  NMR (500 MHz,  $\text{CDCl}_3$ )  $\delta$  0.92 (6H, t,  $J = 7.4$  Hz,  $2 \times \text{CH}_3$ ), 1.60-1.66 (4H, m,  $2 \times \text{CH}_2$ ), 3.53- 3.58 (4H, m,  $2 \times \text{NCH}_2$ ), 3.65 (1H, d,  $J = 13.2$  Hz, 1H of  $\text{CH}_2\text{S}$ ), 3.69 (1H, d,  $J = 13.1$  Hz, 1H of  $\text{CH}_2\text{S}$ ), 4.01 (1H, s,  $\text{CHS}$ ), 4.03 (1H, s,  $\text{CHS}$ ), 4.13 (1H, d,  $J = 13.2$  Hz, 1H of  $\text{CH}_2\text{S}$ ), 4.14



(1H, d, J = 13.1 Hz, 1H of CH<sub>2</sub>S), 6.14 (1H, s, ArH), 7.14-7.31 (11H, m, 1H ArH and 10H of benzyl groups).

<sup>13</sup>C NMR (75 MHz, CDCl<sub>3</sub>) δ 11.7 (2 × CH<sub>3</sub>), 21.2 (2 × CH<sub>2</sub>), 34.6 (2 × CH<sub>2</sub>S), 42.1 (2 × CH<sub>2</sub>N), 43.0 (2 × CHS), 91.0 (ArCH), 118.9 (2 × ArC), 122.5 (2 × ArCH), 127.5 (ArCH), 127.6 (ArCH), 128.7 (2 × ArCH), 128.8 (2 × ArCH), 129.5 (2 × ArCH), 129.6 (ArCH), 137.5 (ArC), 137.6 (ArC), 144.8 (ArC), 144.9 (ArC), 176.3 (2 × C=O),

IR ν<sub>max</sub>/(cm<sup>-1</sup>) 3410, 3061, 2966, 1714 (C=O), 1614, 1487, 1372, 1208, 1129.

MS *m/z* (EI<sup>+</sup> mode) 516 (M<sup>+</sup>, 7%), 393 (16%), 124 (8%), 91 (100%), 77 (16%), 65 (43%).

C<sub>30</sub>H<sub>33</sub>O<sub>2</sub>N<sub>2</sub>S<sub>2</sub> requires 517.1987. Found 517.1978.

### Representative procedure for the connective Pummerer cyclisation with a 1,4-bis-glyoxamides

#### 3,7-Bis-(4-bromo-benzylsulfanyl)-1,5-dihexyl-5,7-dihydro-1*H*,3*H*-pyrrolo[2,3-*f*]indole-2,6-dione 29

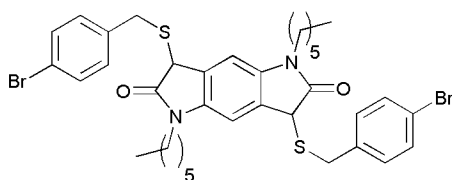

To a solution of oxalyl chloride (223 μl, 2.56 mmol, 2.2 eq) in CH<sub>2</sub>Cl<sub>2</sub> (6 ml) at -78 °C was added DMSO (330 μl, 4.65 mmol, 4 eq) in CH<sub>2</sub>Cl<sub>2</sub> (5 ml). After stirring for 30 min a solution of *N,N'*-(1,4-phenylene)*bis*(*N*-hexyl-2-hydroxyacetamide) (456 mg, 1.16 mmol, 1 eq) in CH<sub>2</sub>Cl<sub>2</sub> (5 ml) was added. After a further 1 h at -78 °C, NEt<sub>3</sub> (1.62 ml, 11.62 mmol, 10 eq) was added and the reaction allowed to stir at room temperature for 1 h. CH<sub>2</sub>Cl<sub>2</sub> (10 ml) was added to the reaction mixture and the organic layer washed with aqueous saturated NaHCO<sub>3</sub> (3 × 25 ml), dried (Na<sub>2</sub>SO<sub>4</sub>), filtered and concentrated *in vacuo* to give the crude *bis*-glyoxamide, which was used without further purification. CH<sub>2</sub>Cl<sub>2</sub> (6 ml) was added to a portion of crude *bis*-glyoxamide (227 mg, 0.58 mmol, 1 eq) followed by 4-bromobenzyl mercaptan (236 mg, 1.16 mmol, 2 eq) in CH and the reaction was allowed to stir at room temperature for 18 h. TFAA (1.47 ml, 10.44 mmol, 18 eq) was then added and after a further 1 h BF<sub>3</sub>•OEt<sub>2</sub> (713 μl, 5.80 mmol, 10 eq) was also added. After stirring for 1 h, the reaction mixture was quenched with aqueous saturated NaHCO<sub>3</sub>.

(20 ml) and  $\text{CH}_2\text{Cl}_2$  (15 ml) added and the organic layer separated. The organic fraction was washed with aqueous saturated  $\text{NaHCO}_3$  ( $2 \times 20$  ml), dried ( $\text{Na}_2\text{SO}_4$ ), filtered and concentrated *in vacuo* to give the crude mixture as a red solid. The crude reaction mixture was then purified by flash chromatography using 15% EtOAc in petroleum ether as eluant to afford 3,7-bis-(4-bromobenzylsulfanyl)-1,5-dihexyl-5,7-dihydro-1*H*,3*H*-pyrrolo[2,3-*f*]indole-2,6-dione **29** as a 1:1 mixture of diastereoisomers (238 mg, 0.31 mmol, 54%).

$^1\text{H}$  NMR (500 MHz,  $\text{CDCl}_3$ )  $\delta$  0.81 (12H, t,  $J = 7.2$  Hz,  $4 \times \text{CH}_3$  of both diastereoisomers), 1.18-1.29 (24H, m,  $4 \times \text{CH}_2\text{CH}_2\text{CH}_2\text{CH}_3$  of both diastereoisomers), 1.67-1.69 (4H, quin,  $J = 7.2$  Hz,  $4 \times \text{NCH}_2\text{CH}_2$  of both diastereoisomers), 3.46-3.53 (2H, m,  $2 \times 1\text{H}$  from  $\text{CH}_2\text{N}$  of both diastereoisomers), 3.55-3.61 (2H, m,  $2 \times 1\text{H}$  from  $\text{CH}_2\text{N}$  of both diastereoisomers), 3.59 (1H, d,  $J = 13.2$  Hz, 1H from  $\text{CH}_2\text{S}$  of one diastereoisomer), 3.62 (1H, d,  $J = 13.2$  Hz, 1H from  $\text{CH}_2\text{S}$  of one diastereoisomer), 4.04 (1H, s, *CHS* of one diastereoisomer), 4.05 (1H, d,  $J = 13.2$  Hz, 1H from  $\text{CH}_2\text{S}$  of one diastereoisomer), 4.07 (1H, s, *CHS* of one diastereoisomer), 4.13 (1H, d,  $J = 13.2$  Hz, 1H from  $\text{CH}_2\text{S}$  of one diastereoisomer), 6.57 (4H, s,  $4 \times \text{ArH}$  of both diastereoisomers), 7.12-7.16 (8H, m,  $8 \times \text{ArH}$  of both diastereoisomers), 7.29-7.34 (8H, m,  $8 \times \text{ArH}$  of both diastereoisomers).

$^{13}\text{C}$  NMR (125 MHz,  $\text{CDCl}_3$ )  $\delta$  14.1 ( $4 \times \text{CH}_3$ ), 22.6 ( $4 \times \text{CH}_2$ ), 26.5 ( $4 \times \text{CH}_2$ ), 27.4 ( $4 \times \text{CH}_2$ ), 29.7 ( $4 \times \text{CH}_2$ ), 33.6 ( $4 \times \text{CH}_2\text{S}$ ), 40.4 ( $4 \times \text{CH}_2\text{N}$ ), 43.5 ( $4 \times \text{CHS}$ ), 106.9 ( $4 \times \text{ArCH}$ ), 121.2 ( $4 \times \text{ArC}$ ), 126.0 ( $4 \times \text{ArC}$ ), 130.9 ( $4 \times \text{ArCH}$ ), 131.5 ( $4 \times \text{ArCH}$ ), 136.3 ( $4 \times \text{ArC}$ ), 139.1 ( $4 \times \text{ArC}$ ), 174.2 ( $4 \times \text{C=O}$ ).

IR  $\nu_{\text{max}}/(\text{cm}^{-1})$  2924, 1681, 1465, 1346, 1226, 1124, 1095, 1009, 987

MS  $m/z$  ( $\text{ES}^-$  mode) 757 ( $(\text{M}+\text{H})^+$ , 43%), 569 (100%), 415.2 (35%), 339.7 (18%), 273 (10%).

# Selected $^1\text{H}$ and $^{13}\text{C}$ NMR spectra

## $^1\text{H}$ NMR of **19**

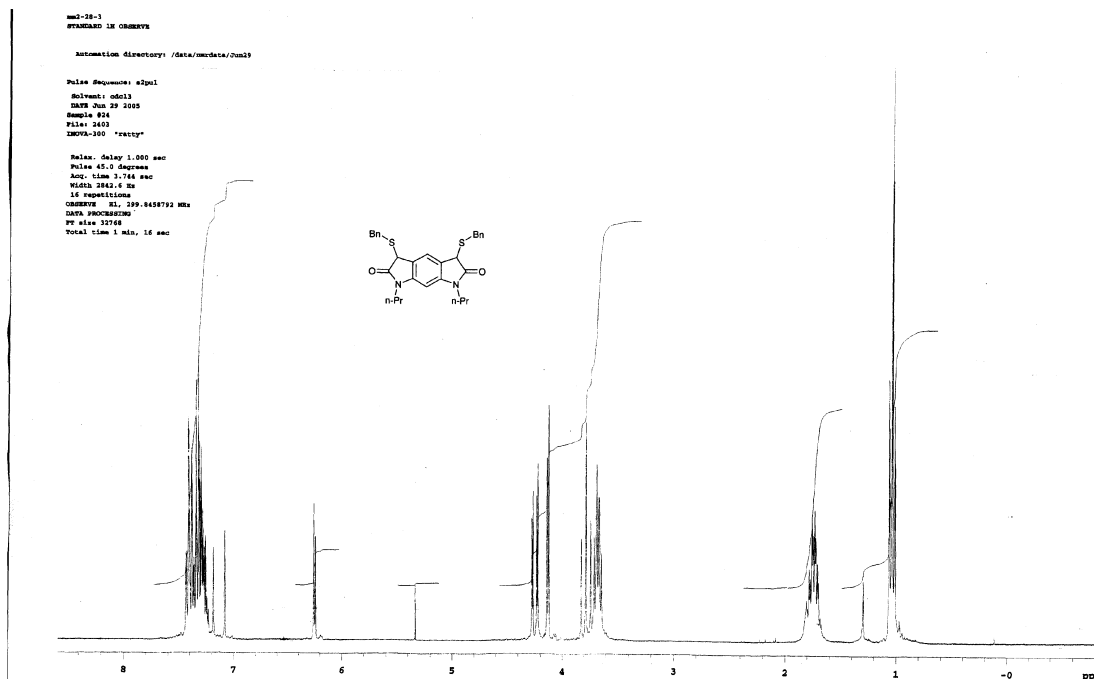

## $^{13}\text{C}$ NMR of **19**

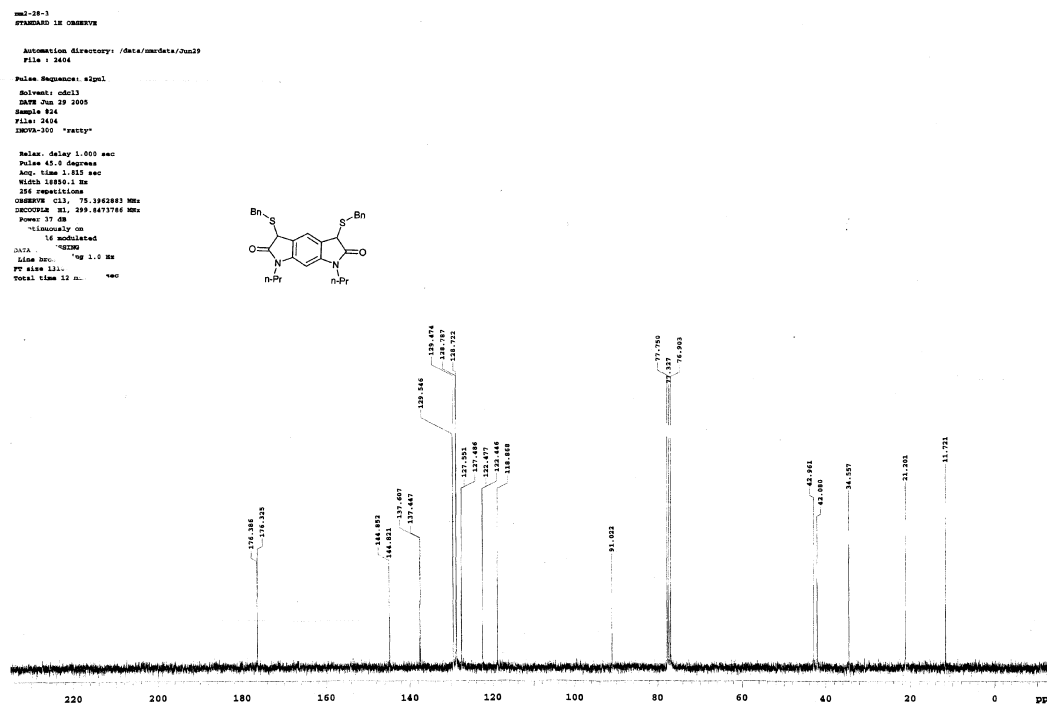

# <sup>1</sup>H NMR of 21

nm2-96-2  
STANDARD IN OBSERVE  
FULL spectrum  
Automation directory: /data/metadata/Nov03  
File: 2702

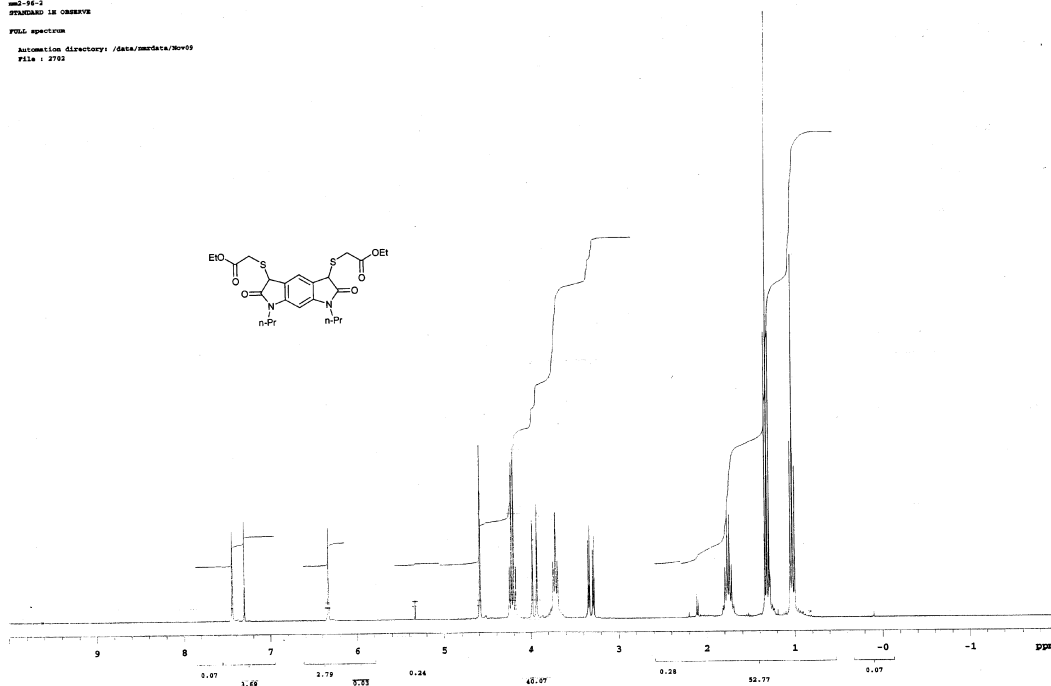

# <sup>13</sup>C NMR of 21

nm2-96-2  
STANDARD IN OBSERVE  
Automation directory: /data/metadata/Nov03  
File: 2704

Solvent: cdcl3  
Date Mon 10 2003  
Sample 827  
File: 2704  
Conv: 100 "raty"  
Pulse: delay 1.000 sec  
Pulse 45.0 degree  
Acq. time 1.815 sec  
NUC1 13C101.1 Hz  
256 repetitions  
OBSERVE C13, 75.3822683 MHz  
DECOUPLE H1, 299.6427868 MHz  
Power 37 dB  
continuously on  
WALTZ-16 modulated  
DATA PROCESSING  
line broadening 1.0 Hz  
PPM scale 131073  
Total time 32 min, 2 sec

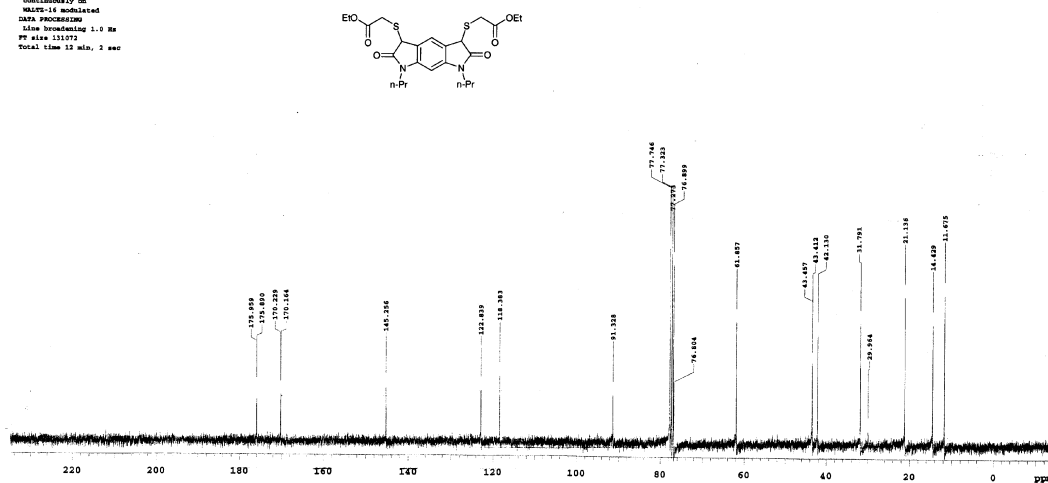

# <sup>1</sup>H NMR of 12

msl-05-3  
STANDARD 12 OBSERVE

Automation Directory: /data/mrdata/april7  
File: 1102

Solvent: cdcl3  
DATE: Apr 18 2004  
Sample #11  
File: 1102  
INSTR: 300 "vax300b"

Pulse: Delay 1.000 sec  
Pulse: 45.0 degrees  
Acq. time: 3.744 sec  
WALTZ: 1795.8 Hz  
16 repetitions  
OBSERVE: RL 299.848792 MHz  
DATA PROCESSING  
PT: 110272  
Total time: 1 min, 16 sec

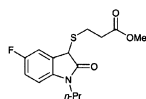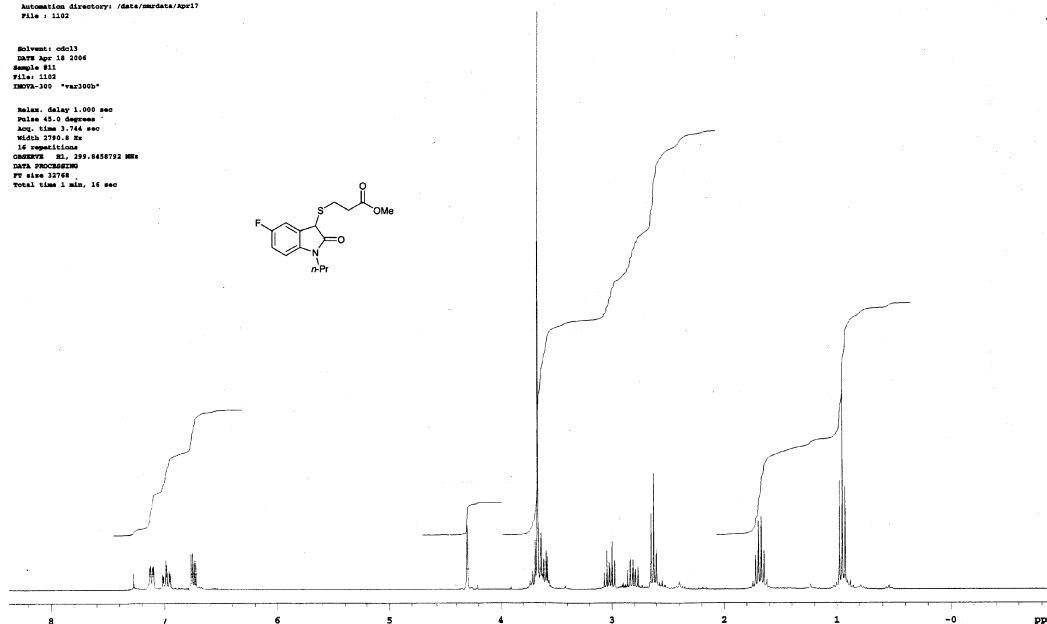

# <sup>13</sup>C NMR of 12

msl-05-3  
STANDARD 12 OBSERVE

Automation Directory: /data/mrdata/april7  
File: 1103

Solvent: cdcl3  
DATE: Apr 18 2004  
Sample #11  
File: 1103  
INSTR: 300 "vax300b"

Pulse: Delay 1.000 sec  
Pulse: 45.0 degrees  
Acq. time: 1.515 sec  
WALTZ: 1855.1 Hz  
256 repetitions  
OBSERVE: CLJ 75.352283 MHz  
DECOUPLE: RL 299.847378 MHz  
Power: 37 dB  
continuously on  
WALTZ-16 modulated  
DATA PROCESSING  
line broadening: 1.0 Hz  
PT: 110772  
Total time: 12 min, 2 sec

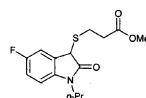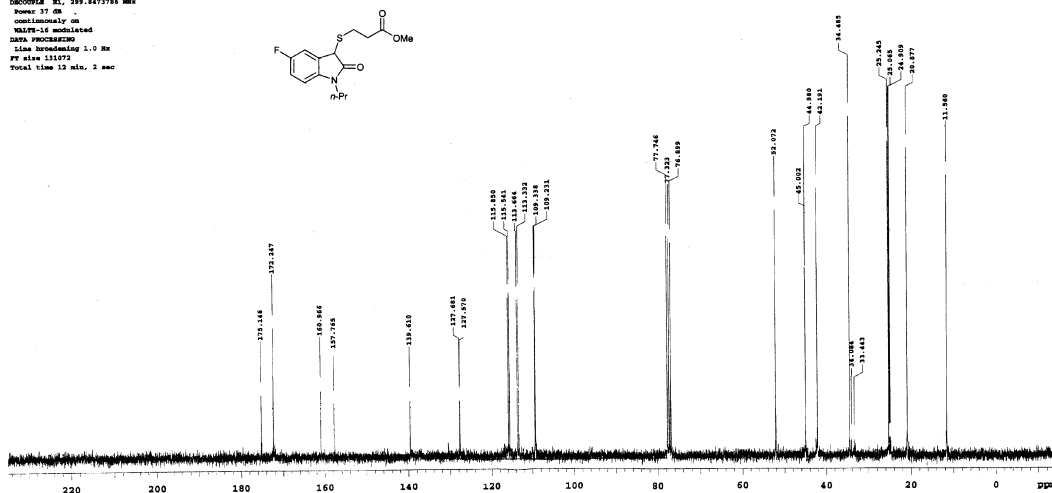

# <sup>1</sup>H NMR of 11

mm4-79-1  
mPROTONight CDC13 /opt/topspin djp 37

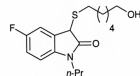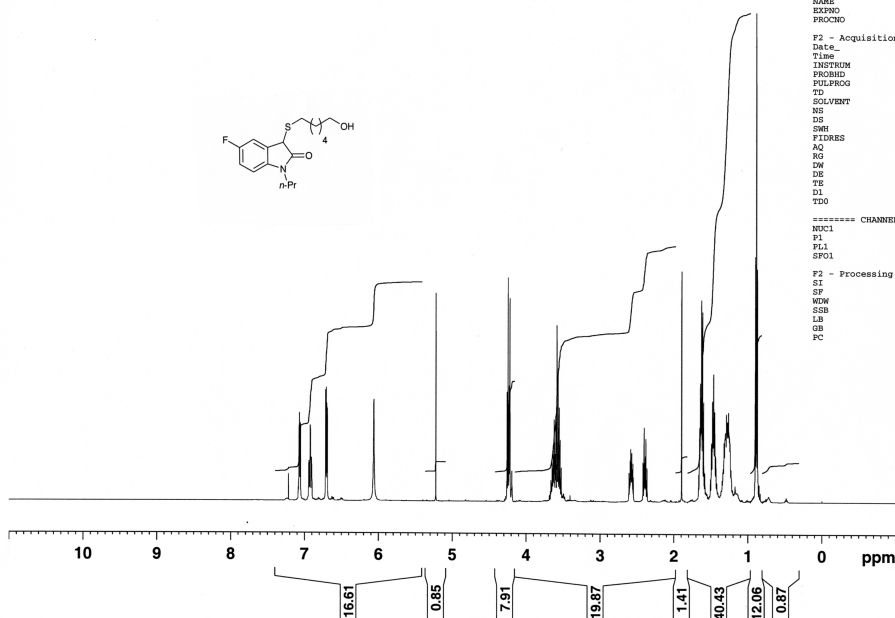

Current Data Parameters  
NAME 2006-09-08-djp-37  
EXPNO 10  
PROCNO 1  
F2 - Acquisition Parameters  
Date\_ 20060908  
Time 20.33  
INSTRUM spect  
PROBHD 5 mm BBO BB-1H  
PULPROG zg30  
TD 65536  
SOLVENT CDC13  
NS 16  
DS 4  
SWH 10330.578 Hz  
FIDRES 0.157632 Hz  
AQ 3.1719923 sec  
RG 32  
RW 48.400 usec  
DE 13.00 usec  
TE 300.0 K  
D1 1.0000000 sec  
TDO 1  
===== CHANNEL f1 =====  
NUC1 1H  
P1 10.00 usec  
PL1 -0.30 dB  
SFO1 500.131085 MHz  
F2 - Processing parameters  
SI 32768  
SF 500.130282 MHz  
WDW EM  
SSB 0  
LB 0.30 Hz  
GB 0  
PC 1.00

# <sup>13</sup>C DEPT NMR of 11

mm4-79-1  
mDEPT135night CDC13 /opt/topspin djp 37

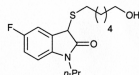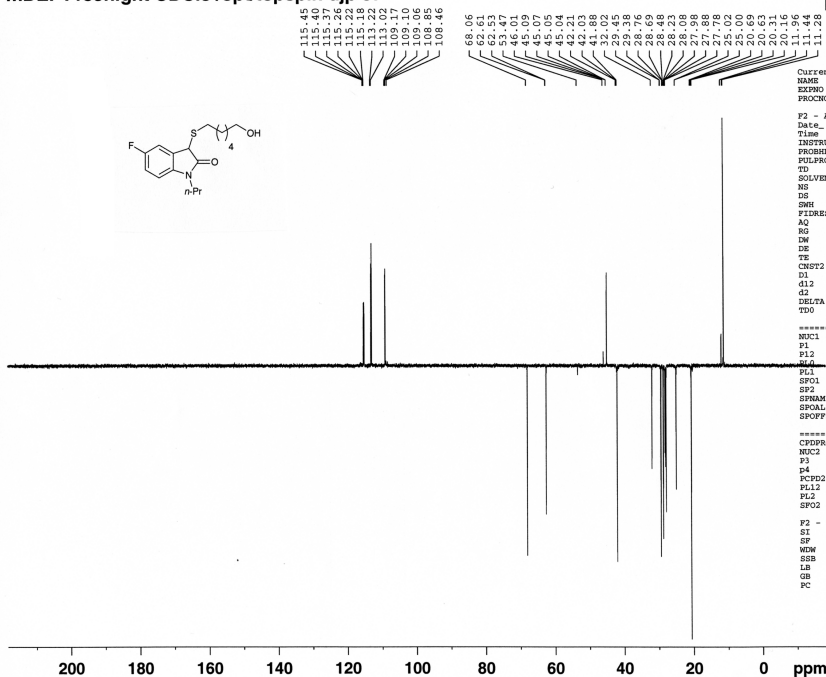

Current Data Parameters  
NAME 2006-09-08-djp-37  
EXPNO 12  
PROCNO 1  
F2 - Acquisition Parameters  
Date\_ 20060908  
Time 20.55  
INSTRUM spect  
PROBHD 5 mm BBO BB-1H  
PULPROG deptpl35  
TD 65536  
SOLVENT CDC13  
NS 128  
DS 4  
SWH 29761.904 Hz  
FIDRES 0.454131 Hz  
AQ 1.1010548 sec  
RG 912  
RW 16.800 usec  
DE 6.00 usec  
TE 300.0 K  
CNU2 145.000000  
D1 2.0000000 sec  
d12 0.0000200 sec  
d2 0.00344828 sec  
DELTA 0.0000929 sec  
TDO 1  
===== CHANNEL f1 =====  
NUC1 13C  
P1 7.10 usec  
PL1 2000.00 usec  
PL2 120.00 dB  
PL3 -1.50 dB  
SFO1 125.7703643 MHz  
SF2 9.39 dB  
SPRM2 Crp60comp.4  
SFOAL2 0.500  
SFOFFS2 0.00 Hz  
===== CHANNEL f2 =====  
CPDPRG2 waltz16  
NUC2 1H  
P3 9.39 usec  
P4 18.78 usec  
PCPD2 80.00 usec  
PL12 17.76 dB  
PL2 -0.30 dB  
SFO2 500.1310005 MHz  
F2 - Processing parameters  
SI 32768  
SF 125.7577890 MHz  
WDW EM  
SSB 0  
LB 1.00 Hz  
GB 0  
PC 1.40

# <sup>1</sup>H NMR of 29

mm4-65-  
mPROTONnight CDCl<sub>3</sub> /opt/topspin djp 36

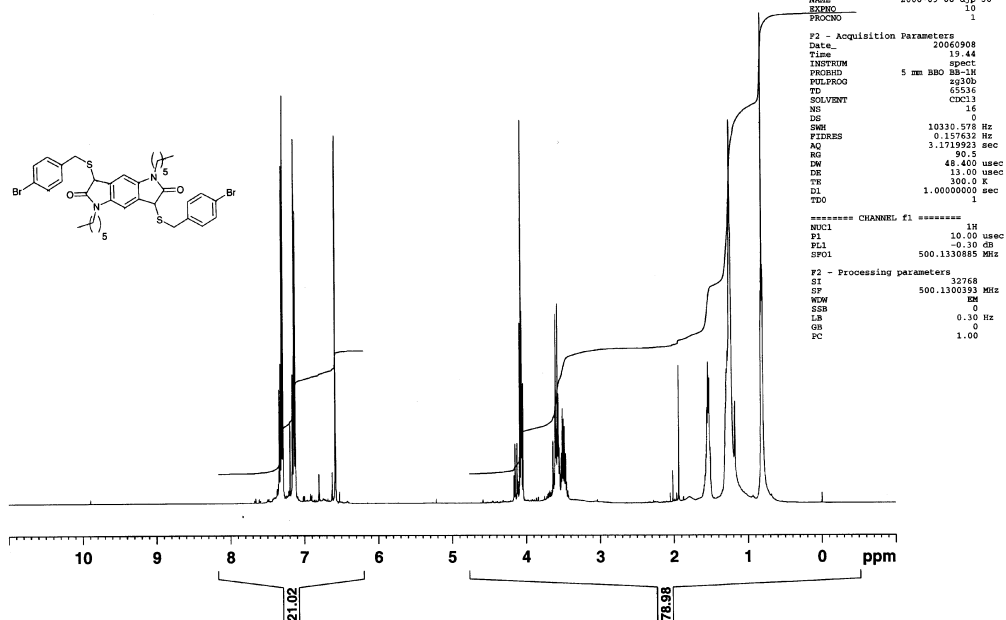

# <sup>13</sup>C NMR of 29

mm4-65-  
mCARBONnight CDCl<sub>3</sub> /opt/topspin djp 36

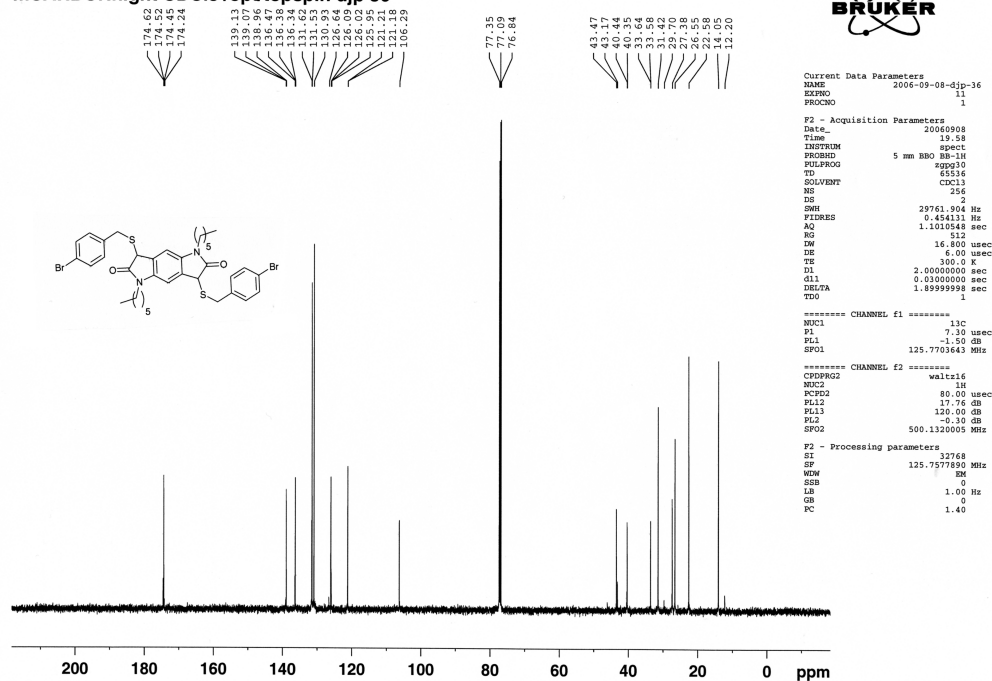

# <sup>1</sup>H NMR of 30

mm4-77+68-1  
mPROTON CDCl<sub>3</sub> /opt/topspin djp 22

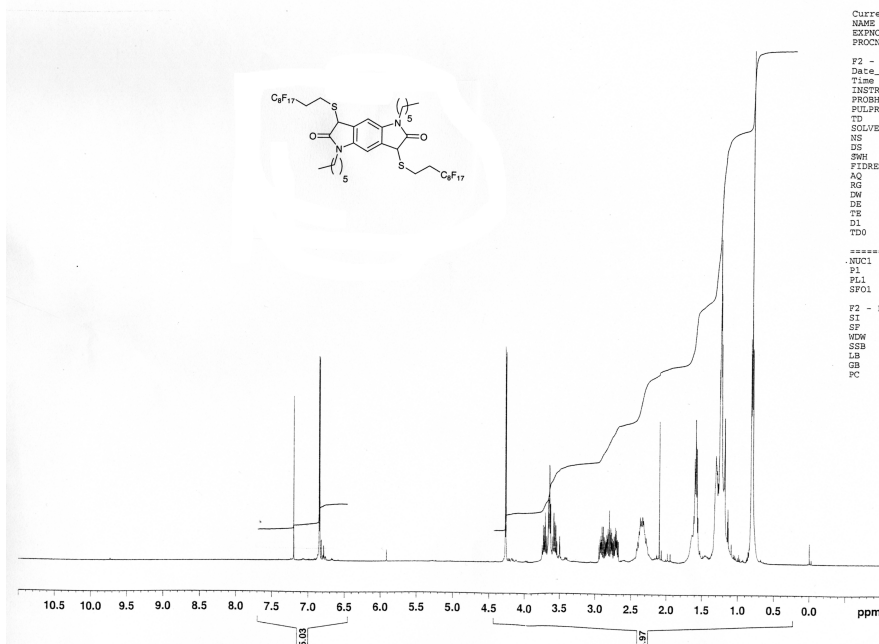

**BRUKER**

Current Data Parameters  
NAME 2006-08-22-djp-22  
EXPNO 10  
PROCNO 1

F2 - Acquisition Parameters  
Date\_ 20060823  
Time 16.05  
INSTRUM spect  
PROBHD 5 mm BBO BB-1H  
PULPROG zg30b  
TD 65536  
SOLVENT CDCl<sub>3</sub>  
NS 16  
DS 0  
SWH 10330.578 Hz  
FIDRES 0.157632 Hz  
AQ 3.1719923 sec  
RG 161  
DM 48.400 us  
DE 13.00 us  
TE 300.0 K  
D1 1.0000000 sec  
TDO 1

\*\*\*\*\* CHANNEL f1 \*\*\*\*\*  
NUC1 1H  
P1 10.00 us  
PL1 -0.30 dB  
SFO1 500.1330885 MHz

F2 - Processing parameters  
SI 32768  
SF 500.1300395 MHz  
WDW EM  
SSB 0  
LB 0.30 Hz  
GB 0  
PC 1.00

# <sup>1</sup>H NMR of 32

mm4-84-2  
mPROTON CDCl<sub>3</sub> /opt/topspin djp 39

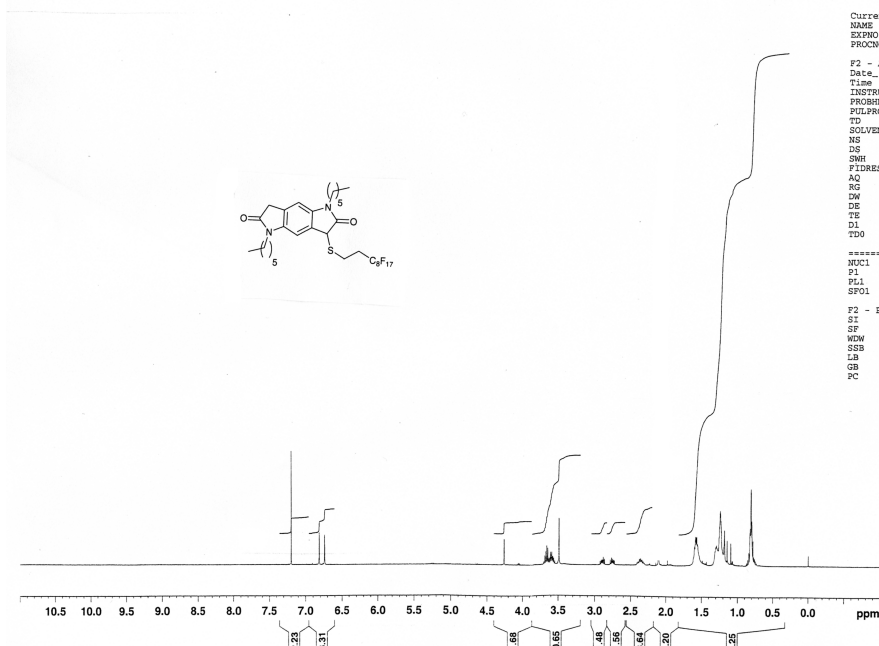

**BRUKER**

Current Data Parameters  
NAME 2006-08-24-djp-39  
EXPNO 10  
PROCNO 1

F2 - Acquisition Parameters  
Date\_ 20060825  
Time 8.22  
INSTRUM spect  
PROBHD 5 mm BBO BB-1H  
PULPROG zg30b  
TD 65536  
SOLVENT CDCl<sub>3</sub>  
NS 16  
DS 0  
SWH 10330.578 Hz  
FIDRES 0.157632 Hz  
AQ 3.1719923 sec  
RG 406  
DM 48.400 us  
DE 13.00 us  
TE 300.0 K  
D1 1.0000000 sec  
TDO 1

\*\*\*\*\* CHANNEL f1 \*\*\*\*\*  
NUC1 1H  
P1 10.00 us  
PL1 -0.30 dB  
SFO1 500.1330885 MHz

F2 - Processing parameters  
SI 32768  
SF 500.1300402 MHz  
WDW EM  
SSB 0  
LB 0.30 Hz  
GB 0  
PC 1.00



# <sup>1</sup>H NMR of 31

mm4-74-1  
mPROTON CDCl<sub>3</sub> /opt/topspin djp 38

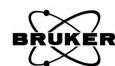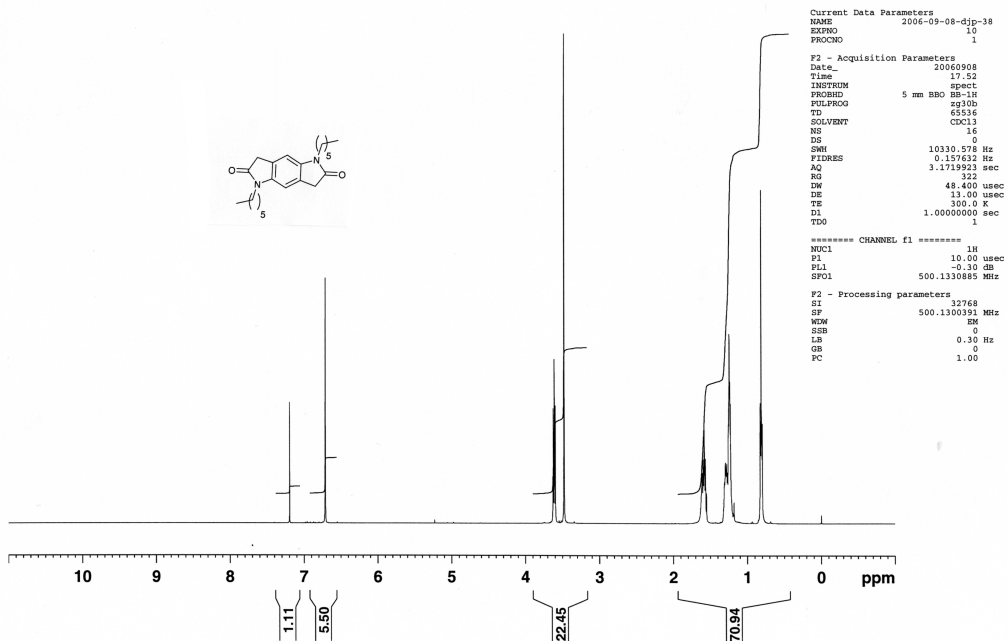

Supplement: b613591a.pdf [file b613591a.pdf]
